# Supplementary material for: Association between contemporary hormonal contraception and ovarian cancer in women of reproductive age in Denmark: prospective, nationwide cohort study
Source: PubMed Central journal article supplement — BMJ. 2018 Sep 26;362:k3609. doi: 10.1136/bmj.k3609 (PMC6283376; doi:10.1136/bmj.k3609), 2018-09-26
Supplement: ivel044929.ww.pdf [file ivel044929.ww.pdf]

## SUPPLEMENTAL TABLES

Table 1S. Relative risk of ovarian cancer in users of different hormonal contraceptive products during follow-up (full cohort). Never use as reference.

|                                                                  | Person-years | Cancer events | Adjusted* Relative Risk<br>(95% confidence interval) |
|------------------------------------------------------------------|--------------|---------------|------------------------------------------------------|
| <u>Current or recent use of combined hormonal contraception:</u> |              |               |                                                      |
| <b>Oral</b>                                                      |              |               |                                                      |
| Norethisterone 50µg EE†                                          | 57,516       | 4             | 0.96 (0.36-2.56)                                     |
| Levonorgestrel 50µg EE                                           | 82,756       | 9             | 1.26 (0.65-2.43)                                     |
| Norethisterone 30-35µg EE                                        | 165,211      | 8             | 0.99 (0.49-2.01)                                     |
| Levonorgestrel 30-35 µg EE                                       | 1,016,015    | 23            | 0.43 (0.28-0.65)                                     |
| Desogestrel 20-30 µg EE                                          | 1,659,258    | 31            | 0.46 (0.32-0.66)                                     |
| Gestodene 20-35 µg EE                                            | 2,985,909    | 58            | 0.48 (0.36-0.63)                                     |
| Drospirenone 20-35 µg EE                                         | 592,556      | 13            | 0.65 (0.37-1.15)                                     |
| Norgestimate 35 µg EE                                            | 721,004      | 19            | 0.64 (0.40-1.01)                                     |
| Cyproterone 30 µg EE                                             | 317,961      | 6             | 0.48 (0.21-1.07)                                     |
| Estradiol valerate, dienogest                                    | 14,081       | 0             | -                                                    |
| <b>Non-oral</b>                                                  |              |               |                                                      |
| Patch                                                            | 15,358       | 0             | -                                                    |
| Vaginal ring                                                     | 124,280      | 4             | 0.93 (0.35-2.52)                                     |
| <u>Current or recent use of progestogen-only:</u>                |              |               |                                                      |
| <b>Oral</b>                                                      |              |               |                                                      |
| Norethisterone                                                   | 158,073      | 7             | 0.62 (0.29-1.30)                                     |
| Levonorgestrel                                                   | 11,544       | 2             | 1.65 (0.41-6.62)                                     |
| Desogestrel                                                      | 123,539      | 2             | 0.33 (0.08-1.32)                                     |
| <b>Non-oral</b>                                                  |              |               |                                                      |
| MPA depot                                                        | 27,832       | 3             | 2.62 (0.84-8.17)                                     |
| Implant                                                          | 58,371       | 1             | 0.51 (0.07-3.64)                                     |
| LNG-IUS                                                          | 708,111      | 44            | 0.72 (0.53-0.99)                                     |

\*Adjusted for: calendar year, parity, age, education, tubal sterilisation, hysterectomy, endometriosis, polycystic ovary syndrome and family history of breast or ovarian cancer.

†Ethinylestradiol

Table 2S. Relative risk of ovarian cancer in users of different hormonal contraceptive products in women aged 15 on or after 1<sup>st</sup> January 1995 (full hormonal contraceptive history).

|                                                               | Person-years | Cancer events | Adjusted* Relative Risk<br>(95% confidence interval) |
|---------------------------------------------------------------|--------------|---------------|------------------------------------------------------|
| Never Use                                                     | 1,570,546    | 21            | 1.00                                                 |
| Ever use (any hormonal contraception)                         | 3,846,722    | 56            | 0.65 (0.36-1.18)                                     |
| Former use (any hormonal)                                     | 593,309      | 14            | 0.93 (0.41-2.10)                                     |
| Current or recent use (any hormonal)                          | 3,253,413    | 42            | 0.61 (0.33-1.13)                                     |
| <u>Current or recent use combined hormonal contraception:</u> |              |               |                                                      |
| <u>Oral</u>                                                   |              |               |                                                      |
| Norethisterone 50µg EE†                                       | 2,656        | 0             | -                                                    |
| Levonorgestrel 50µg EE                                        | 7,344        | 0             | -                                                    |
| Norethisterone 30-35µg EE                                     | 19,361       | 1             | 2.73 (0.35-21.30)                                    |
| Levonorgestrel 30-35 µg EE                                    | 391,616      | 6             | 0.84 (0.30-2.32)                                     |
| Desogestrel 20-30 µg EE                                       | 675,407      | 11            | 0.77 (0.35-1.70)                                     |
| Gestodene 20-35 µg EE                                         | 1,119,559    | 12            | 0.50 (0.23-1.09)                                     |
| Drospirenone 20-35 µg EE                                      | 367,906      | 4             | 0.52 (0.17-1.59)                                     |
| Norgestimate 35 µg EE                                         | 246,673      | 3             | 0.56 (0.16-1.95)                                     |
| Cyproterone 30 µg EE                                          | 131,097      | 1             | 0.33 (0.04-2.56)                                     |
| Estradiol valerate, dienogest                                 | 6,176        | 0             | -                                                    |
| <u>Non-oral</u>                                               |              |               |                                                      |
| Patch                                                         | 9,973        | 0             | -                                                    |
| Vaginal ring                                                  | 78,628       | 1             | 0.51 (0.07-3.96)                                     |
| <u>Current or recent use of progestogen-only:</u>             |              |               |                                                      |
| <u>Oral</u>                                                   |              |               |                                                      |
| Norethisterone                                                | 26,449       | 1             | 1.71 (0.22-13.30)                                    |
| Levonorgestrel                                                | 261          | 0             | -                                                    |
| Desogestrel                                                   | 51,912       | 0             | -                                                    |
| <u>Non-oral</u>                                               |              |               |                                                      |
| MPA depot                                                     | 15,865       | 0             | -                                                    |
| Implant                                                       | 36,337       | 0             | -                                                    |
| LNG-IUS                                                       | 66,195       | 2             | 1.46 (0.30-7.21)                                     |

\*Adjusted for: calendar year, parity, age, education, tubal sterilisation, hysterectomy, endometriosis, polycystic ovary syndrome and family history of breast or ovarian cancer.

†Ethinylestradiol

Table 3S. Relative risk of epithelial ovarian cancer in users of different types of hormonal contraception in women followed until first switch in hormonal contraception (i.e. “no change cohort”).

|                                                                         | Person-years | Cancer events | Adjusted* Relative Risk (95% confidence interval) |
|-------------------------------------------------------------------------|--------------|---------------|---------------------------------------------------|
| Never Use                                                               | 8,150,250    | 566           | 1.00                                              |
| Ever use (any hormonal contraception)                                   | 7,183,430    | 207           | 0.72 (0.61-0.86)                                  |
| Former use (any hormonal)                                               | 2,590,322    | 126           | 0.86 (0.70-1.06)                                  |
| Current or recent use (any hormonal)                                    | 4,593,109    | 81            | 0.58 (0.46-0.75)                                  |
| <b>Current or recent use of combined hormonal contraception:</b>        |              |               |                                                   |
| <b>Oral</b>                                                             |              |               |                                                   |
| Norethisterone 50µg EE†                                                 | 36,494       | 3             | 1.47 (0.47-4.59)                                  |
| Levonorgestrel 50µg EE                                                  | 47,335       | 3             | 0.84 (0.27-2.62)                                  |
| Norethisterone 30-35µg EE                                               | 116,090      | 3             | 0.93 (0.30-2.90)                                  |
| Levonorgestrel 30-35 µg EE                                              | 519,113      | 7             | 0.30 (0.14-0.64)                                  |
| Desogestrel 20-30 µg EE                                                 | 988,952      | 9             | 0.38 (0.20-0.75)                                  |
| Gestodene 20-35 µg EE                                                   | 1,887,047    | 27            | 0.60 (0.40-0.89)                                  |
| Drospirenone 20-35 µg EE                                                | 188,928      | 3             | 1.24 (0.39-3.91)                                  |
| Norgestimate 35 µg EE                                                   | 375,778      | 7             | 0.79 (0.37-1.67)                                  |
| Cyproterone 30 µg EE                                                    | 142,147      | 0             | -                                                 |
| Estradiol valerate, dienogest                                           | 1,022        | 0             | -                                                 |
| <b>Non-oral</b>                                                         |              |               |                                                   |
| Patch                                                                   | 2,253        | 0             | -                                                 |
| Vaginal ring                                                            | 11,729       | 0             | -                                                 |
| <b>Current or recent use of progestogen-only contraception:</b>         |              |               |                                                   |
| <b>Oral</b>                                                             |              |               |                                                   |
| Norethisterone                                                          | 66,934       | 3             | 0.63 (0.20-1.96)                                  |
| Levonorgestrel                                                          | 6,972        | 1             | 1.57 (0.22-11.2)                                  |
| Desogestrel                                                             | 12,155       | 0             | -                                                 |
| <b>Non-oral</b>                                                         |              |               |                                                   |
| MPA depot                                                               | 7,321        | 3             | 9.54 (3.06-29.8)                                  |
| Implant                                                                 | 10,575       | 0             | -                                                 |
| LNG-IUS                                                                 | 172,265      | 12            | 0.71 (0.40-1.26)                                  |
| <b>Duration of current or recent use of any hormonal contraception†</b> |              |               |                                                   |
| ≤ 1 year                                                                | 1,061,532    | 22            | 0.82 (0.53-1.27)                                  |
| >1-≤5 years                                                             | 2,313,446    | 38            | 0.63 (0.45-0.89)                                  |
| >5-≤10 years                                                            | 961,018      | 18            | 0.51 (0.31-0.82)                                  |
| >10 years                                                               | 257,112      | 3             | 0.18 (0.06-0.56)                                  |
| <b>Time since last current use of any hormonal contraception‡</b>       |              |               |                                                   |
| >1-≤5 years                                                             | 1,280,405    | 43            | 0.73 (0.54-1.01)                                  |
| >5-≤10 years                                                            | 827,350      | 50            | 0.99 (0.73-1.34)                                  |
| >10 years                                                               | 482,566      | 33            | 0.90 (0.61-1.31)                                  |

\*Adjusted for: calendar year, parity, age, education, tubal sterilisation, hysterectomy, endometriosis, polycystic ovary syndrome and family history of breast or ovarian cancer.

†Ethinylestradiol

Table 4S. Age at diagnosis of ovarian cancer and FIGO stage (full cohort).

| Age at diagnosis<br>(years) | All tumours by FIGO stage* |             |              |             |                  | Total<br>n (%) |
|-----------------------------|----------------------------|-------------|--------------|-------------|------------------|----------------|
|                             | I<br>n (%)                 | II<br>n (%) | III<br>n (%) | IV<br>n (%) | Unknown<br>n (%) |                |
| <20                         | 20 (64.5)                  | 5 (16.1)    | 0 (0)        | 2 (6.4)     | 4 (12.9)         | 31 (100.0)     |
| 20-29                       | 49 (47.1)                  | 10 (9.6)    | 18 (17.3)    | 13 (12.5)   | 14 (13.5)        | 104 (100.0)    |
| 30-39                       | 92 (40.9)                  | 29 (12.9)   | 42 (18.7)    | 38 (16.9)   | 24 (10.7)        | 225 (100.0)    |
| 40+                         | 249 (28.0)                 | 137 (15.4)  | 232 (26.1)   | 193 (21.7)  | 78 (8.8)         | 889 (100.0)    |
| Total                       | 410 (32.8)                 | 181 (14.5)  | 292 (23.4)   | 246 (19.7)  | 120 (9.6)        | 1249 (100.0)   |

\*p-trend<0.001

Table 5S. Different histological types of ovarian cancer by FIGO stage at diagnosis (full cohort).

| Histology                                      | FIGO stage |             |              |             |                  | Total cancer events<br>n |
|------------------------------------------------|------------|-------------|--------------|-------------|------------------|--------------------------|
|                                                | I<br>n (%) | II<br>n (%) | III<br>n (%) | IV<br>n (%) | Unknown<br>n (%) |                          |
| Any epithelial                                 | 290 (32.1) | 125 (13.8)  | 230 (25.5)   | 177 (19.6)  | 80 (8.9)         | 902                      |
| Clear cell                                     | 36 (59.0)  | 8 (13.1)    | 7 (11.5)     | 9 (14.7)    | 1 (1.6)          | 61                       |
| Endometriod                                    | 62 (45.9)  | 23 (17.0)   | 22 (16.3)    | 16 (11.8)   | 12 (8.9)         | 135                      |
| Mucinous                                       | 129 (63.2) | 16 (7.8)    | 20 (9.8)     | 10 (4.9)    | 29 (14.2)        | 204                      |
| Serous                                         | 63 (12.5)  | 78 (15.5)   | 181 (36.1)   | 142 (28.3)  | 38 (7.6)         | 502                      |
| Non-epithelial                                 | 43 (58.9)  | 10 (13.7)   | 3 (4.1)      | 2 (2.7)     | 15 (20.5)        | 73                       |
| Malignant tumour<br>not elsewhere<br>specified | 77 (28.1)  | 46 (16.8)   | 59 (21.5)    | 67 (24.4)   | 25 (9.1)         | 274                      |
